# Supplementary material for: A Novel HER3-Targeting Antibody–Drug Conjugate, U3-1402, Exhibits Potent Therapeutic Efficacy through the Delivery of Cytotoxic Payload by Efficient Internalization
Source: Oxford University Press journal article supplement (doi:10.1158/1078-0432.ccr-19-1745), 2019-08-30
Supplement: 10780432ccr191745-sup-223066_2_supp_5691191_pvrk78.xlsx [file 10780432ccr191745-sup-223066_2_supp_5691191_pvrk78.xlsx]

## Sheet: Sheet1 (2)
Supplementary Table 1. Summary of repeated dose toxicity studies in rats and monkeys
Species	Crl:CD(SD) rats	Cynomolgus monkeys
Regimens	0, 20, 60 and 194 mg/kg	0, 3, 10 and 30 mg/kg
	Intravenous, every 3 weeks for 12 weeks (5 times in total)	Intravenous, every 3 weeks for 12 weeks (5 times in total)
No. of animals	10/sex/group (main): all dose groups	3/sex/group (main): all dose groups
	5/sex/group (recovery): 0, 60, 194 mg/kg	2/sex/group (recovery): 30 mg/kg
Lethal dose	194 mg/kg (1 male died)	>30 mg/kg
Body weight	<60 mg/kg: normal	<30 mg/kg: normal
	194 mg/kg: decreased
Hematology	>20 mg/kg: decreased WBC parameters	>3 mg/kg: decreased RET, LYM and PLT parameters
	>60 mg/kg: decreased RET
Blood chemistry	>60 mg/kg: increased transaminases	>10 mg/kg: increased transaminases
Target organs and tissues	>20 mg/kg: lymphatic/hematopoietic organs, gastrointestinal tract, reproductive organs, skin, incisor, liver	>10 mg/kg: thymus, ovary
	>60 mg/kg: lung, kidney	30 mg/kg: bone marrow, skin
	194 mg/kg: urinary bladder, harderian gland, salivary gland, skeletal muscle
STD10/HNSTD	STD10: 194 mg/kg	HNSTD: 30 mg/kg
WBC: white blood cell; RET: reticulocyte; LYM: lymphocyte; PLT: platelet; STD10: severely toxic dose of 10% in animals; HNSTD: highest non-severely toxic dose
