# Supplementary material for: A Novel HER3-Targeting Antibody–Drug Conjugate, U3-1402, Exhibits Potent Therapeutic Efficacy through the Delivery of Cytotoxic Payload by Efficient Internalization
Source: Oxford University Press journal article supplement (doi:10.1158/1078-0432.ccr-19-1745), 2019-08-30
Supplement: 10780432ccr191745-sup-223066_2_supp_5691192_pvrk78.docx [file 10780432ccr191745-sup-223066_2_supp_5691192_pvrk78.docx]

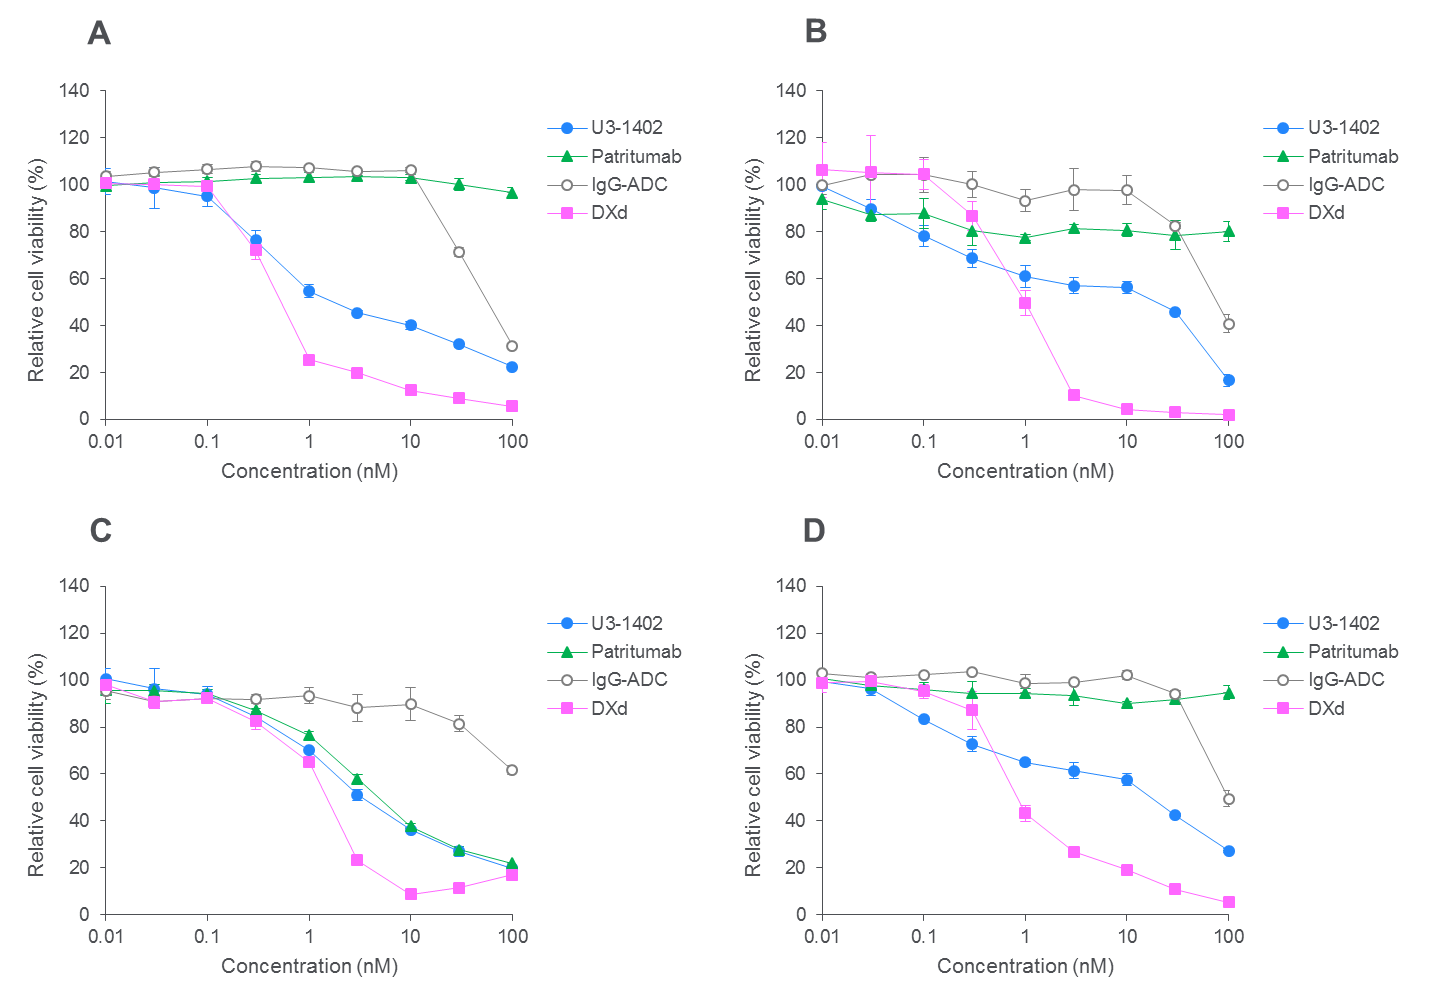


**
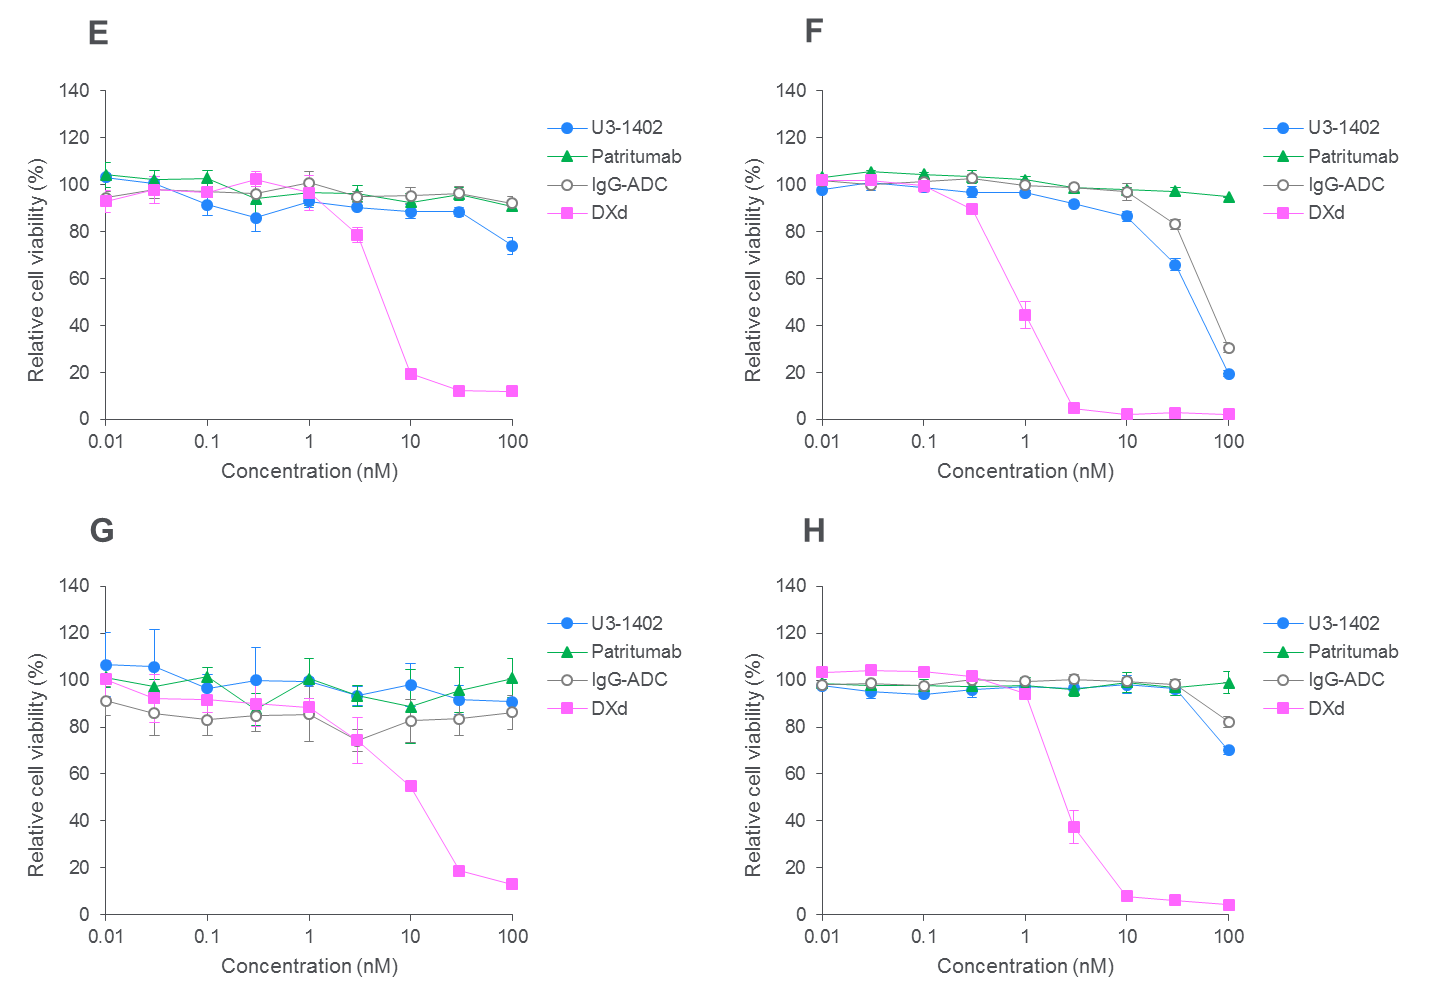
**

**Supplementary Figure 2. Growth inhibition activity in 8 cell lines with different HER3 expression levels. A,** HCC1569. **B,** SK-BR-3. **C,** MDA-MB-175VII. **D,** MDA-MB-453. **E,** MDA-MB-361. **F,** OVCAR-8. **G,** JIMT-1. **H,** MDA-MB-231. The cells were treated with U3-1402, patritumab, IgG-ADC, and DXd for 6 days. Each point represents the mean and SD (N=3).
